# Supplementary material
Source: PubMed Central journal article supplement (PMC3413241)
Supplement: ac300815c_si_001.pdf [file ac300815c_si_001.pdf]

## **Supporting Information for:**

### **Facile detection of aminoglycoside antibiotics using RNA aptamers and gold nanoparticle probes.**

✦ Nicola Derbyshire<sup>1</sup>, ✦ Simon J. White<sup>1</sup>, David H.J. Bunka<sup>1</sup>, Lei Song<sup>1,2</sup>, Sara Stead<sup>3</sup>, Jonathan Tarbin<sup>3</sup>, Matthew Sharman<sup>3</sup>, Dejian Zhou<sup>1,2</sup> & Peter G Stockley<sup>1\*</sup>

<sup>1</sup> Astbury Centre for Structural Molecular Biology & <sup>2</sup> School of Chemistry, University of Leeds, Leeds, LS2 9JT, UK.

<sup>3</sup> The Food & Environmental Research Agency, Sand Hutton, Yorkshire, YO41 1LZ, UK.

✦ The authors wish it to be known that, in their opinion, the first two authors should be regarded as joint First Authors

\*To whom correspondence should be addressed: [p.g.stockley@leeds.ac.uk](mailto:p.g.stockley@leeds.ac.uk)

## **Further Information for Materials and Methods**

### *AMG biotinylation and immobilisation and purification*

Apramycin, gentamicin, kanamycin, neomycin, paromomycin and tobramycin were incubated at five-fold molar excess over the NHS-PEG<sub>12</sub>-Biotin in PBS for 30 min, at room temperature on a roller. Streptomycin was incubated at a ten-fold molar excess with hydrazide-PEG<sub>4</sub>-biotin overnight, under the same conditions. Reactions were terminated through the addition of a ten-fold molar excess of glycine. All reactions were analysed by LC-ToF-MS (Agilent 1200 series LC connected to an Agilent 6224 ToF-MS) using a Waters (Hertfordshire, UK) Acquity HSS T3 50 x 2.1mm 1.8 µm column with mobile phases of a) 0.1% formic acid in water and b) 0.1% formic acid in methanol and a gradient elution of 5% B to 99% B in 15 minutes. Positive-mode electrospray ionisation was used. Data analysis was carried out using Agilent MassHunter software. As a confirmatory measure a small portion of the biotinylated AMGs were incubated with an excess of streptavidin magnetic beads (SA-MB) and bound AMGs partitioned then eluted in a 100 fold excess of free biotin at room temperature for three days on a roller. The AMG samples were analysed pre and post bead incubation, and post biotin competition elution in order to confirm immobilised. For SELEX, SA-MBs were saturated with biotinylated AMG at 4°C, overnight on a roller. Mono-biotinylated aminoglycosides were isolated to a purity >95% using an Agilent 1260 LC Prep system (Waters XBridge Prep 5 µm OBD 19 x 100mm column) connected to an Agilent 6120 Quadropole MS with Agilent Chemstation detection software. A gradient of 5-95%(v/v), water/methanol plus 0.1%(v/v) formic acid, over 8 min with a flow-rate of 20 ml/min and detection was in positive ion mode. Expected and observed masses for mono-biotinylated AMGs are shown in Supporting Information Table S2.

### *SELEX and cloning*

The initial dsDNA library consists of approximately 10<sup>15</sup> sequences, each containing an N<sub>30</sub> random region, flanked by fixed primer regions; one of which carries the T7 RNA polymerase promoter. Aptamer selections were carried out on a Biomek 2000

liquid handling system, using protocols based on those described in detail elsewhere<sup>4,36</sup>. In order to isolate aptamers which recognise the features common amongst the AMGs, a series of toggle selections were performed, alternating the selection target between pairs of structurally similar AMGs. The toggle pairs were as follows; gentamicin with apramycin, kanamycin with tobramycin and paromomycin with neomycin. The toggle partner for streptomycin (dihydrostreptomycin) could not be successfully immobilised, so no toggle was carried out during that selection. PBS supplemented with 10% (v/v) methanol was used for all binding and washing steps. In the first 5 rounds, the aptamer pool was counter selected against underivatized streptavidin beads, prior to incubation with the selection target. Bound species were eluted by thermal denaturation before being amplified by RT-PCR, to create an enriched library for the subsequent round. In rounds 6 to 11, bound RNA species were eluted by a competition wash with a high concentration ( $1 \text{ mg ml}^{-1}$ ) of non-biotinylated AMG.

Aptamer pools eluted from round 11 were cloned into the pGEM-T Easy Vector system (Promega UK) and subsequently used to transform XL10-Gold Ultracompetent *E. coli* (Stratagene UK) following manufacturers protocols. For each aptamer pool, 2x96 well culture plates were inoculated using an automated colony picker and the inserted sequence amplified out using primers specific to regions of the pGEM-T vector to yield a ~350 bp PCR product that contains the aptamer sequence. This was then amplified using aptamer specific primers to 'release' the 100 bp aptamer template. PCR products were checked using the 5K DNA assay kit on the Caliper GXII capillary electrophoresis system. Aptamer clones were identified by the presence of the ~350bp product in the pGEM-T primer amplification and the 100 bp product in the aptamer amplification. Sequences cloned successfully were transcribed using the Y639F variant T7 RNA polymerase and 2'-F CTP and UTP and purified using Rnacleen resin ready for analysis.

### *Preparation of GNPs*

26 nm GNPs were prepared from  $\text{HAuCl}_4$  by the citrate reduction method. All glassware was initially washed and submerged for 10 mins in aqua regia which is a

3:1 mixture of hydrochloric and nitric acid. This was followed by thorough rinses with pure water. A 1.05 mM H<sub>AuCl</sub><sub>4</sub> aqueous solution (100 ml) was prepared, adjusted to pH 7 using 1 M NaOH and then heated to reflux in a round bottomed flask on a stirrer hotplate. A solution containing 294 mg of tri-sodium citrate dissolved in 10 ml water was then added to the H<sub>AuCl</sub><sub>4</sub> solution. The resulting solution was then refluxed for a further 30 minutes until a constant wine red colour emerged. The solution was then allowed to cool to room temperature to form the 26 nm GNP stock. The stock concentration of the 26 nm GNP particles was on average 0.5 nM (this varied a little from batch to batch), calculated from the peak plasmon absorbance (530 nm) using the Beer-Lambert law (extinction coefficient  $3.0 \times 10^9 \text{ M}^{-1} \cdot \text{cm}^{-1}$ ). We found that each batch of gold nanoparticles was different. Each batch required different concentrations of NaCl to cause aggregation and that the sensitivity of the AMG-GNP assay altered with each batch.

### *Structure probing*

10 µg of LGA11 and LS13 aptamers (2'-OH transcripts) were dephosphorylated using Antarctic phosphatase (New England Biolabs (NEB) M0289S) following manufacturer's instructions. 5 µg of the dephosphorylated RNA was then 5'-labelled with ATP-γ-P using T4 polynucleotide kinase (NEB M0201S) following manufacturer's instructions. A decade marker (Ambion, 7778) was radio labelled in the same manner and cleaved following manufacturer's instructions. The radio labelled RNA were gel purified by electroelution, ethanol precipitated and resuspended in 25 µL of nuclease free water. The two radio labelled aptamers were cleaved with gradients of RNase A, T, V and S (all sourced from Ambion) in the presence of un-labelled yeast RNA then ethanol precipitated and resuspended in 5 µL of RNA loading buffer. Samples were analysed by 20 % denaturing PAGE and the cleavage patterns compared to the secondary structure predictions made by Mfold.

## Tables

| AMG                  | No. of rings | pKa experimental (theoretical) | pl    | Approx charge at pH 7 | H-bond acceptors | H bond donors | Rotatable bonds |
|----------------------|--------------|--------------------------------|-------|-----------------------|------------------|---------------|-----------------|
| A                    | 4            | 8.5(13.01)                     | 10.92 | 5                     | 16               | 11            | 6               |
| D                    | 2            | 7.8                            | 11.79 | 3                     | 15               | 13            | 9               |
| G (C <sub>1</sub> )  | 3            | 8.2(13.16)                     | 11.38 | 5                     | 12               | 8             | 7               |
| G (C <sub>2</sub> )  | 3            |                                |       |                       | 12               | 8             |                 |
| G (C <sub>1a</sub> ) | 3            | (13.16)                        |       |                       | 12               | 8             | 6               |
| K (A)                | 3            | 7.2(12.75)                     | 10.81 | 4                     | 15               | 11            | 6               |
| K (B)                | 3            |                                |       |                       | 15               | 11            |                 |
| K (C)                | 3            |                                |       |                       | 15               | 11            |                 |
| N (B)                | 4            | (13.19)                        | 10.97 | 5                     | 19               | 13            | 9               |
| P                    | 4            | (12.90)                        | 10.94 | 4                     | 19               | 13            | 9               |
| S                    | 3            |                                | 10.72 | 3                     | 19               | 14            | 9               |
| T                    | 3            | (13.13)                        | 11.11 | 5                     | 14               | 10            | 6               |

**Table S1. Physical and chemical properties of AMGs**

(<http://www.drugbank.ca>, <http://www.chemicalize.org>, <http://www.chemspider.com>, Reference 44)

| Aminoglycoside             | Expected mass (Da) | Observed (m/z) | Assignment           |
|----------------------------|--------------------|----------------|----------------------|
| <b>Mono-biotinylated-A</b> | 1365               | 1388.0         | (M+Na) 705.4 (M+2Na) |
| <b>Mono-biotinylated-G</b> | C1 - 1303          | 1325.9         | (M(C1)+Na)           |
|                            | C1a – 1275         | 1299.0         | (M(C1a)+Na)          |
|                            | C2 – 1289          | 1312.7         | (M(C2)+Na)           |
| <b>Mono-biotinylated-K</b> | A – 1310           | 1332.9         | (M(A or C)+Na)       |
|                            | B – 1309           | 1310.8         | (M(B)+H)             |
|                            | C – 1310           | 656.1          | (M(A or C)+2H)       |
|                            |                    | 678.0          | (M(A or C)+2Na)      |
| <b>Mono-biotinylated-N</b> | 1440               | 1463.0         | (M+Na)               |
| <b>Mono-biotinylated-P</b> | 1441               | 1464.0         | (M+Na)               |
|                            |                    | 721.5          | (M+2H)               |
| <b>Mono-biotinylated-S</b> | 1068               | 1069           | (M+H)                |
|                            |                    | 546.3          | (M+Na+H)             |
| <b>Mono-biotinylated-T</b> | 1293               | 1315.6         | (M+Na)               |
|                            |                    | 647.4          | (M+2H)               |

**Table S2. Mass spectrometry analysis of AMG biotinylation reactions**

| Aptamer | Random region sequence (5'-3')  | Aptamer | Random region sequence (5'-3') |
|---------|---------------------------------|---------|--------------------------------|
| LGA1    | ACUUCGGCUUGAACUCGAACCUAUCAGGCG  | LPN1    | AACGUUUUUUUUCGCGGUGCUUGUUUGU   |
| LGA 2   | CUUGACGUCGACCACUUAUUUUUUUUCG    | LPN2    | AGUAUCGCCUGUUUUUAAGUCUCAAGUU   |
| LGA 3   | CCGGGCGAUCUCUAAAUAUGUUUUUUCUGU  | LPN3    | GUUAAGUAUACCGUCUAUGGUUUUGGGGC  |
| LGA 4   | CUAAUCAACAUUGAUCUGUUUAGGUGAU    | LPN4    | UGAGGUAUCUCAUCGAGUUGGUUUUUUGC  |
| LGA 5   | CUACCCUUUUUUUGUAAAAGGUGUCAAU    | LPN5    | CACGCCUCACCUUAAAUGCCCAUGAGUG   |
| LGA 6   | AGGACAUUAAUCCGUUUUAUCGCGGGUA    | LPN6    | GGGGCUUCUUAUUUUUGAUGUGGUUCGAG  |
| LGA 7   | UUUUCAGGAGUUAGUGGAUUGCUCUUCGCU  | LPN7    | AGUUUUUAUUGGGUCUUUUUGUUGGGGC   |
| LGA 8   | GUUAACGAUUUCUAGCCAGGGAACGUUUG   | LPN8    | UUGCACCGCAAUCGCUUUUUUAUCUACUC  |
| LGA 9   | CCUUGGUACCGUUUGUUCUUCGCCUCAC    | LPN9    | UUCAGUGGCUUACGUACUCAAUUAGUCAGU |
| LGA 10  | CUUAAUACUUAUGGGCCUGACCCCAUGUUU  | LPN10   | UCCAUGUUUGAUUUUUAAUCGAGCAUCGU  |
| LGA 11  | GGCCCGACAUUCCCCUAAAAAGCUUGUUC   | LPN11   | CUGUAGGUUCGGGCGUCCAACUUUGAUUA  |
| LGA12   | CUACCGUUCUUGCGUUGUUGGAGGUGUAAA  | LPN12   | GUCCAUGCCGCUUUAUGGGAAUUUACUUUA |
| LGA13   | CCCUAAUGGACACAUAUGAGGCCCCACCGU  | LPN13   | CUAUGCGAUACGAGUACUUGGCACAAUUUU |
| LGA14   | CAGGAUUUGGGGUCUCCGAAAUUUUGUCA   | LPN14   | CUCUCCAAUGCCGUUAUUGAUCUAUUCUA  |
| LGA15   | UAAUCUUCUUAUCGAAUCCCCCUCCCAA    | LPN15   | CAAUGAAUUCGAGUCCCAUUUGCUUUUUU  |
| LGA16   | GCUUGCUUUUACUCCGAAUUUAAGCCAUC   | LPN16   | CUGCGAGGAAUUCUUGGUUAUGGUCCCAU  |
| LGA17   | AUUUUUUUGUCCGUAGUUUUUUGACACGAU  | LPN17   | UAUCCAGAUUUGCGUUAAGUCUGUGGGAC  |
| LGA18   | CCUCUUCGCUAGUGUGUACGCGGAGUCUUG  | LPN18   | AGCCAUAGAUUCCCGGUGCGUUUGUGAAU  |
| LGA19   | CUAUUUCUCUUCAUUGUUUGCGUUGGCUU   | LPN19   | UCAGCUAAAGCAUUCGAGUUCUCUUUCGU  |
| LGA20   | AUUCCACCGGGUCUCUAGGGAACUACAAC   | LPN20   | CCGGUGUAUGCCGUCUUAUUAAGAUGUAC  |
| LKT1    | UCUCUCUUUUUUUCUUCUCCCCCGCUUAA   | LS1     | CCAUAUCUCCUUCGCCGCUUAUUGCGCAUA |
| LKT2    | UUUUGGCGUAGUUAUAGUUCGUGUUAACC   | LS 2    | CCGAGUGGAAAGAAUGAGGCCAAUAGGU   |
| LKT3    | UAUAUUCGUUUAAAUAAGAAUUUUAAGUACA | LS 3    | AGGCGUCUGUCCGGGCACCACAGCCUCGU  |
| LKT 4   | GCCACAGACGAAAAUUGGAGUGGAACACGG  | LS 4    | UAUGUGAUCCGAUGGUGGUUUUUUAUCUUG |
| LKT 5   | ACUUGUUUGCCACCUAGUUUAGGUAUUGGA  | LS 5    | UCCCCAGUUGAGUGAUGACCAGCUUCAU   |
| LKT 6   | UUUCCGAGGUUCUAGUUAUCGUCUCUCUUU  | LS 6    | AGGCCACACACUACAUCUGAUUUUAGUUA  |
| LKT 7   | CCAGUCUGAUCUUUUUAUUUUUGUCGCUCC  | LS 7    | CGUGAUAGGGGGGUUGUUUGUCUGAGUUG  |
| LKT 8   | GUUAGUACUACUUCUUUGAUGUCCAUUAA   | LS 8    | AUGCUUUUCCCUAUUUUUUGCAACGUUAUC |
| LKT 9   | CUCGGUUUCGCCUUAUUUAUUGUUUGACUG  | LS 9    | CGGAGAAUCUAAAGUUAUUUAUCAUAGAUU |
| LKT 10  | UCUCCAUCUCAGUCUUAUUUGUCCGGCAUC  | LS 10   | UGACUGAUCCUUGCAUUAUUCGGUUUCCA  |
| LKT 11  | GUUUUGGAACCUUUUCGGCUUUUUUCUGUG  | LS 11   | CGUGCGUACUCCAUGAUUCUACGGUUUUG  |
| LKT 12  | ACAGUCCAUUCAAUUAUAACUGCCAUGAA   | LS 12   | CCGGACCGAGCUGGCGGGUCAGAUUUU    |
| LKT 13  | GGUAAGUUGAACAGUUAGUUAUAGUCAUC   | LS 13   | CCAGUUUUUAUUUUUUUAUUGUUAUAGCU  |
| LKT 14  | ACCCUACGGGUUUCAUUAUUAUUCUGUA    | LS 14   | CACAUUGCUCUGCAUUUACAUAAGAGGAA  |
| LKT 15  | GGUUCUACUUGAAUACCCUGCAGUAAGUUC  | LS 15   | UUUUCCGUUGUUUACCAUUACGUUAUUGUA |
| LKT 16  | UUGUGGCUUCCUGGACCGAUGCUUUAAGG   | LS 16   | CGUGCGUUCUACAGUCCGCCUCAUCCUCA  |
| LKT 17  | CGCCUCCAGAUACGCUUUCUGUAUUCUCU   | LS 17   | GUUCUUGGCUUUUUUAUUUUUAUUCGCAUG |
| LKT 18  | CGGGGUUUCUAAACAGCACAGUCUUUAUCA  | LS 18   | CGUACCUAUGCGGAAUUGUAUAGCACU    |
| LKT 19  | GCGCCUGUUUCCCGUCGUGGUUAUCUUCUC  | LS 19   | GAAUUCUCCAGGAAUCAGCCGUCCUCUGA  |
| LKT 20  | ACACCUUCGAAGUCUCGGUUUUUGAAGUUU  | LS 20   | GGCCCCUUAAUUGCUUUUGAUGUUUCGAU  |

**Table S3. Aptamer sequences.** The random region sequences of 20 of the aptamers cloned from each selection pool are shown.

| Aptamer | L   | G   | A   | K   | T   | P   | N   | S   | Aptamer | L  | G  | A  | K  | T  | P  | N  | S  |
|---------|-----|-----|-----|-----|-----|-----|-----|-----|---------|----|----|----|----|----|----|----|----|
| GA1     | -   | +   | ++  | ++  | ++  | +++ | +++ | ++  | PN1     | -  | -  | -  | -  | -  | -  | -  | -  |
| GA2     | -   | ++  | ++  | +++ | +++ | +++ | ++  | -   | PN2     | -  | -  | -  | -  | -  | -  | -  | -  |
| GA3     | ++  | +++ | -   | +++ | +++ | +++ | +++ | +   | PN3     | -  | -  | -  | -  | -  | -  | -  | -  |
| GA4     | ++  | -   | ++  | ++  | ++  | ++  | ++  | ++  | PN4     | -  | -  | -  | -  | -  | -  | -  | -  |
| GA5     | ++  | +++ | ++  | ++  | ++  | ++  | ++  | -   | PN5     | -  | -  | -  | -  | -  | -  | -  | -  |
| GA6     | +   | +   | ++  | ++  | ++  | ++  | ++  | ++  | PN6     | -  | -  | -  | -  | -  | -  | -  | -  |
| GA7     | -   | -   | +   | +   | -   | +   | +   | +   | PN7     | -  | -  | -  | -  | -  | -  | -  | -  |
| GA8     | +   | -   | -   | -   | -   | -   | -   | +   | PN8     | -  | -  | -  | -  | -  | -  | -  | -  |
| GA9     | +++ | +++ | +++ | +++ | +++ | +++ | ++  | +++ | PN9     | -  | -  | -  | -  | -  | -  | -  | -  |
| GA10    | +   | +   | +   | -   | -   | +   | ++  | ++  | PN10    | -  | -  | -  | -  | -  | -  | -  | -  |
| GA11    | -   | -   | +   | -   | -   | +   | +++ | -   | PN11    | ++ | -  | -  | -  | -  | +  | -  | -  |
| GA12    | -   | -   | -   | -   | -   | +   | ++  | ++  | PN12    | -  | -  | -  | -  | -  | -  | -  | -  |
| GA13    | -   | -   | -   | -   | -   | +   | ++  | ++  | PN13    | -  | +  | -  | -  | -  | -  | -  | -  |
| GA14    | -   | -   | -   | -   | +   | +   | ++  | ++  | PN14    | -  | -  | -  | -  | -  | +  | -  | -  |
| GA15    | -   | -   | +   | -   | ++  | ++  | ++  | ++  | PN15    | -  | -  | -  | -  | -  | -  | -  | -  |
| GA16    | -   | -   | ++  | +   | +   | +   | ++  | +   | PN16    | -  | -  | -  | -  | -  | -  | -  | -  |
| GA17    | ++  | ++  | ++  | ++  | ++  | ++  | +++ | ++  | PN17    | -  | -  | -  | -  | -  | -  | -  | -  |
| GA18    | -   | -   | -   | -   | -   | -   | -   | -   | PN18    | -  | -  | -  | -  | -  | -  | -  | -  |
| GA19    | -   | -   | +   | -   | +   | +   | +   | +   | PN19    | -  | -  | -  | -  | -  | -  | -  | -  |
| GA20    | +   | ++  | ++  | +   | -   | ++  | ++  | ++  | PN20    | -  | -  | -  | -  | -  | -  | -  | -  |
| KT1     | -   | +   | ++  | -   | +   | +++ | -   | +   | SD1     | -  | -  | -  | -  | -  | -  | -  | -  |
| KT2     | -   | +   | ++  | -   | ++  | ++  | +++ | +   | SD2     | -  | -  | -  | -  | -  | -  | -  | -  |
| KT3     | -   | -   | -   | -   | +   | +   | +++ | ++  | SD3     | -  | -  | -  | -  | -  | -  | -  | -  |
| KT4     | -   | -   | -   | -   | -   | +   | +   | +   | SD4     | -  | -  | -  | -  | -  | -  | -  | -  |
| KT5     | -   | -   | -   | +   | +   | +   | +   | +   | SD5     | -  | -  | -  | -  | -  | -  | -  | -  |
| KT6     | -   | +   | +   | +   | +   | +   | +   | -   | SD6     | -  | -  | -  | -  | -  | -  | -  | -  |
| KT7     | ++  | +++ | +++ | +++ | +++ | +++ | +++ | -   | SD7     | -  | -  | -  | -  | -  | -  | -  | -  |
| KT8     | -   | +   | +   | -   | +   | -   | +   | +   | SD8     | -  | -  | -  | -  | -  | -  | +  | -  |
| KT9     | ++  | ++  | ++  | ++  | ++  | ++  | +   | ++  | SD9     | -  | -  | -  | -  | -  | -  | -  | -  |
| KT10    | +   | ++  | ++  | ++  | ++  | ++  | -   | ++  | SD10    | -  | -  | -  | -  | -  | ++ | ++ | ++ |
| KT11    | -   | -   | +   | +   | ++  | +   | ++  | ++  | SD11    | -  | -  | -  | -  | -  | ++ | -  | -  |
| KT12    | -   | -   | -   | +   | +   | -   | ++  | ++  | SD12    | -  | -  | -  | -  | -  | -  | -  | -  |
| KT13    | -   | -   | -   | -   | -   | -   | +   | +   | SD13    | -  | ++ | ++ | ++ | -  | ++ | ++ | ++ |
| KT14    | -   | -   | -   | -   | -   | +   | -   | +   | SD14    | -  | -  | -  | -  | -  | -  | -  | -  |
| KT15    | -   | -   | -   | -   | -   | -   | -   | -   | SD15    | -  | -  | -  | ++ | ++ | ++ | ++ | ++ |
| KT16    | -   | -   | -   | -   | +   | -   | ++  | +   | SD16    | -  | -  | -  | -  | -  | -  | -  | -  |
| KT17    | -   | -   | -   | +   | +   | +   | ++  | ++  | SD17    | -  | -  | -  | -  | -  | -  | -  | -  |
| KT18    | -   | -   | -   | -   | +   | +   | ++  | +   | SD18    | -  | -  | -  | -  | -  | -  | -  | -  |
| KT19    | -   | -   | -   | -   | -   | +   | +   | +   | SD19    | -  | -  | -  | -  | -  | -  | -  | +  |
| KT20    | -   | -   | -   | +++ | +++ | +++ | -   | -   | SD20    | -  | -  | +  | -  | +  | +  | ++ | +  |

Table S4. Pull down assay data from all 80 clones.

## Figures

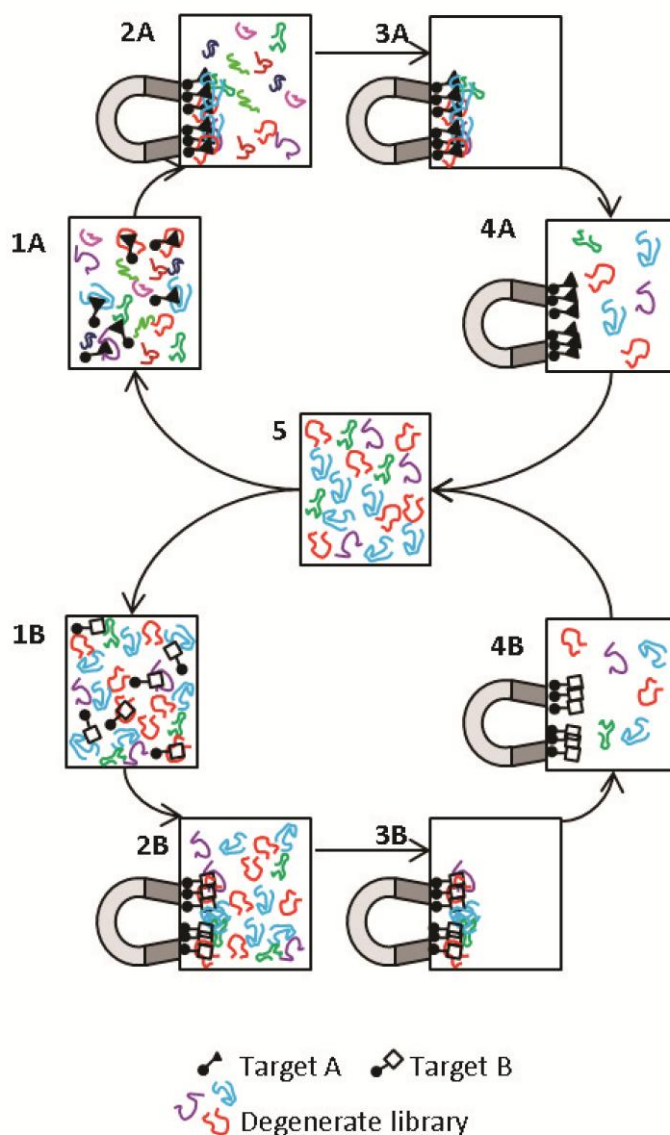

**Figure S1. Outline of Toggle SELEX.** Toggle SELEX alternates a pair targets at the start of each round to isolate aptamers with affinity for both targets. A degenerate library of oligonucleotides is incubated with the targets immobilised on streptavidin magnetic beads (Steps 1). Binders are partitioned (Steps 2) and non-binders removed by washing (Steps 3). Bound sequences are eluted by thermal denaturation (rounds 1-5) or competition with free target (rounds 6-11) (Steps 4) and reverse transcribed and amplified (Steps 5).



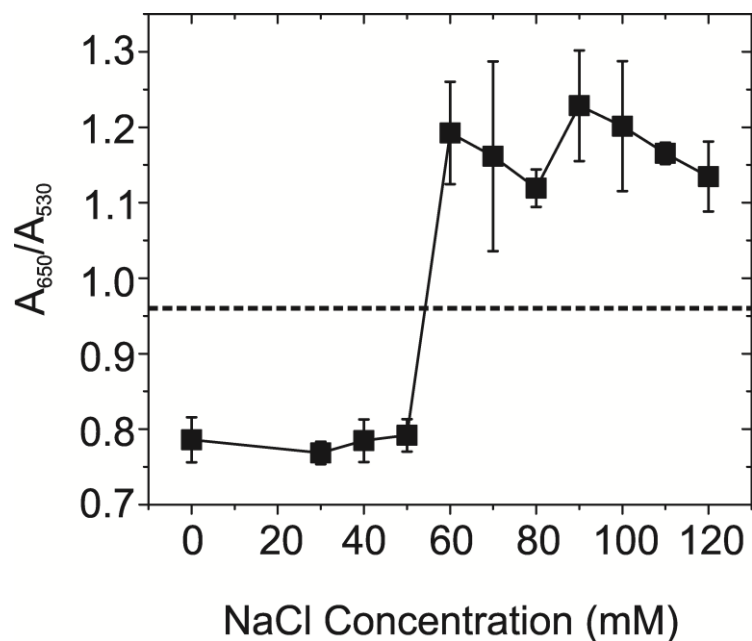

**Figure S2. Salt stabilisation assay.** 1M NaCl was titrated against gold nanoparticles with no RNA aptamer present. The dashed line in the graph highlights the ratio at which the visible colour change occurs: above the line the solutions are blue and below it they are red.

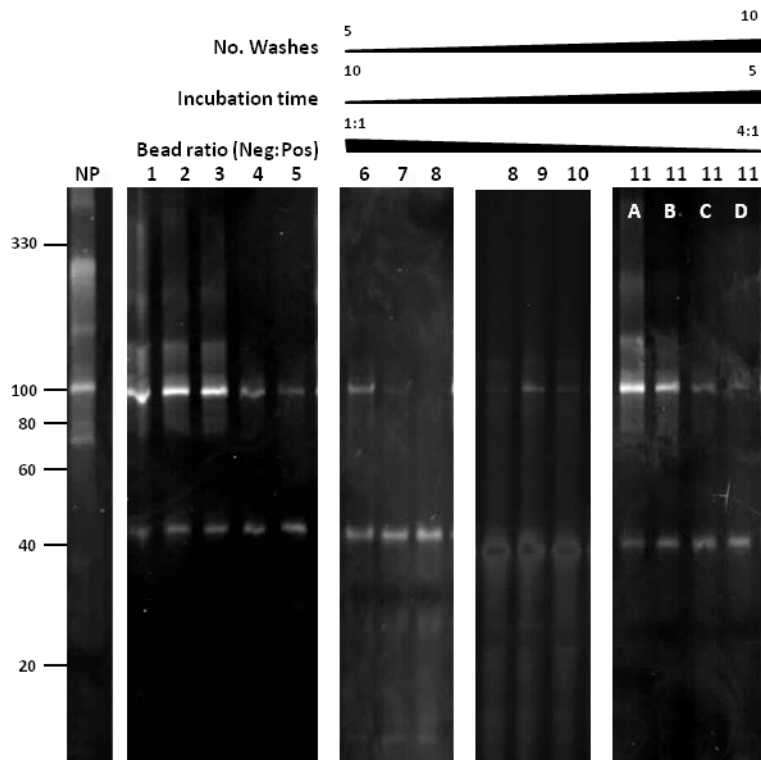

**Figure S3. Example gel electrophoresis images from a single toggle selection sample (paromomycin/neomycin toggle pair).** NP – naive pool, numbers indicates round number. In the final eleventh round A) is the R10 pool following amplification prior to SELEX, and elutions with B) a non-target pair AMG, C) alternate AMG of the toggle pair, and D) cognate AMG target.

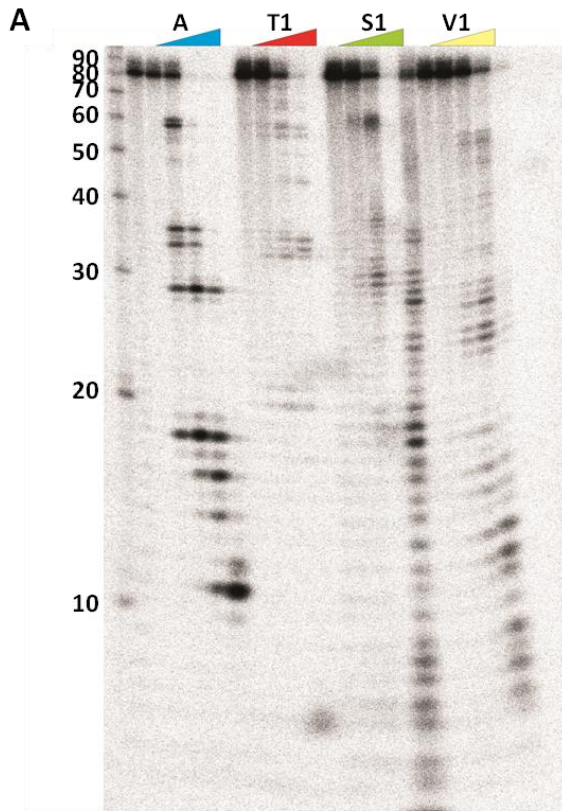

5'GGAGAAGGCGGCGCGUAGGCGAGCUUUAGGCCGACAUU  
 CCCCUAAAAAGCUUGUUCUAUUCGUGGACGAUGCAC3'

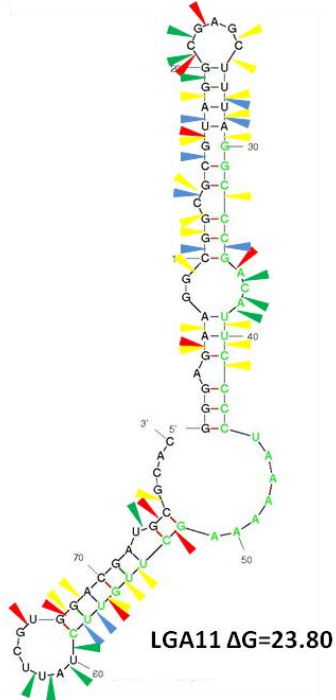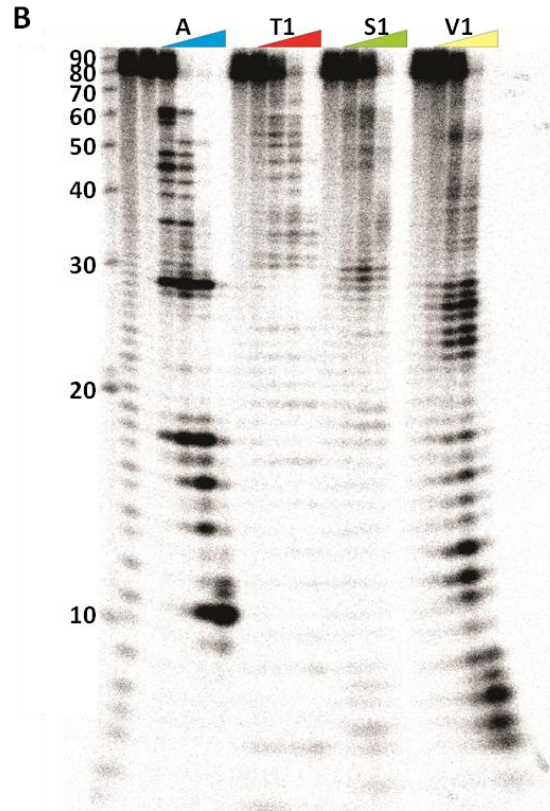

5'GGGAGAAGGCGGCGCGUAGGCGAGCUUUACCAGUUUUUAU  
 UGUUUUAUUGUUAUAUGCUAUUCGUGGACGAUGCAC3'

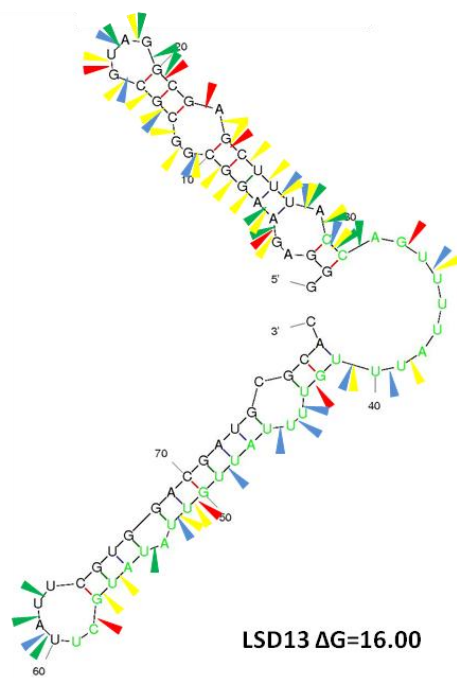

C

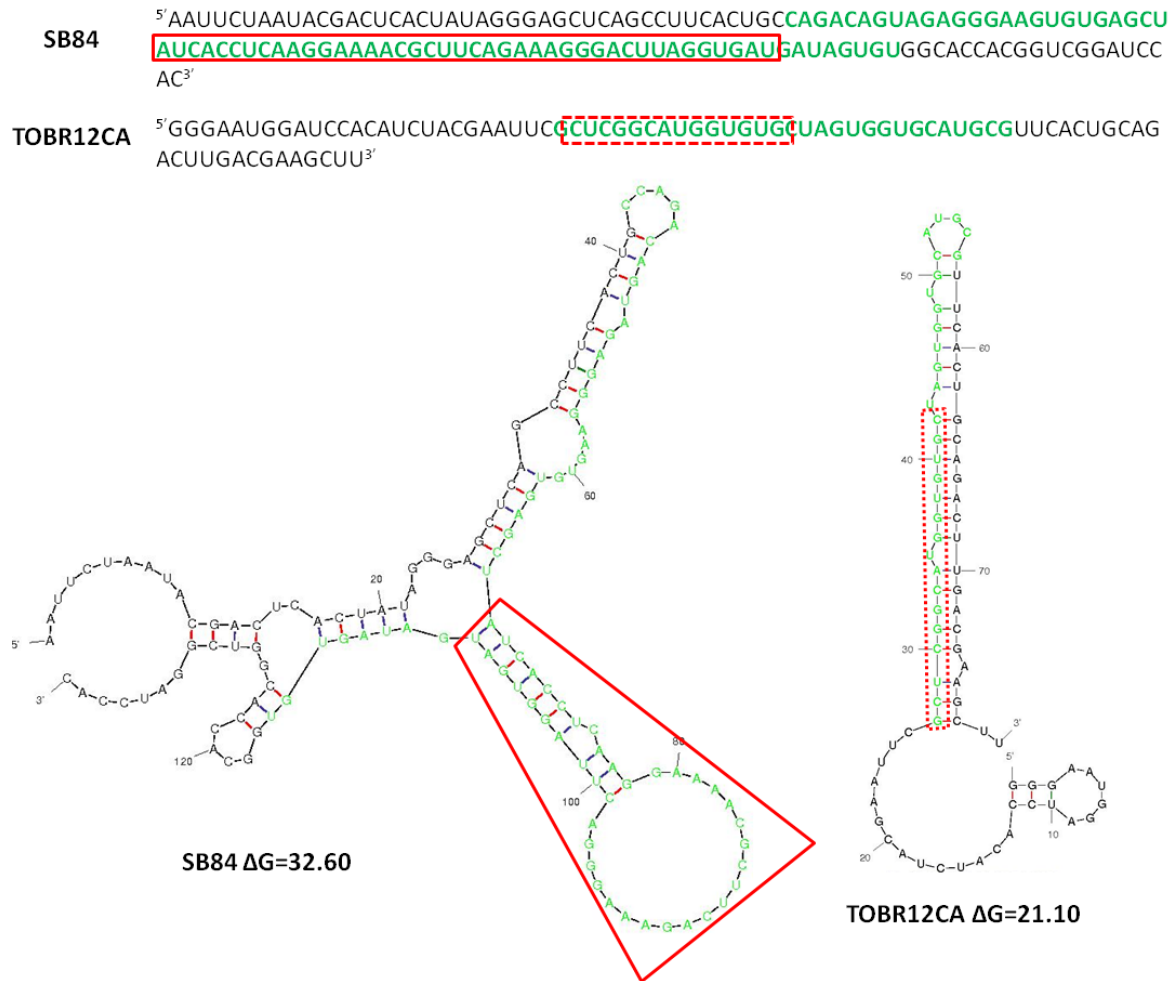

**Supplementary Figure S4. Secondary structures AMG binding aptamers.**

Structure probing gels<sup>45</sup> of LGA11 and LS13 (A and B respectively) also showing the aptamer sequence with the selected sequence region shown in green. Nuclease cleavage sites are indicated by blue, red, green and yellow arrows, for the C- and U-specific RNase A, the G-specific RNase T1, the single-strand-specific nuclease S1, and ds/helical-specific nuclease V1, respectively. These results are consistent with the predicted secondary structures from MFold<sup>46</sup> shown here with the mapped structure probing cleavage sites. Sequences and MFold predictions for SB84 and TOBR12CA are shown (C). Random regions in green and the mapped streptomycin binding region of SB84 highlighted by a solid red box and the conserved motif from the TOBR12CA selection highlighted by a dashed red box.

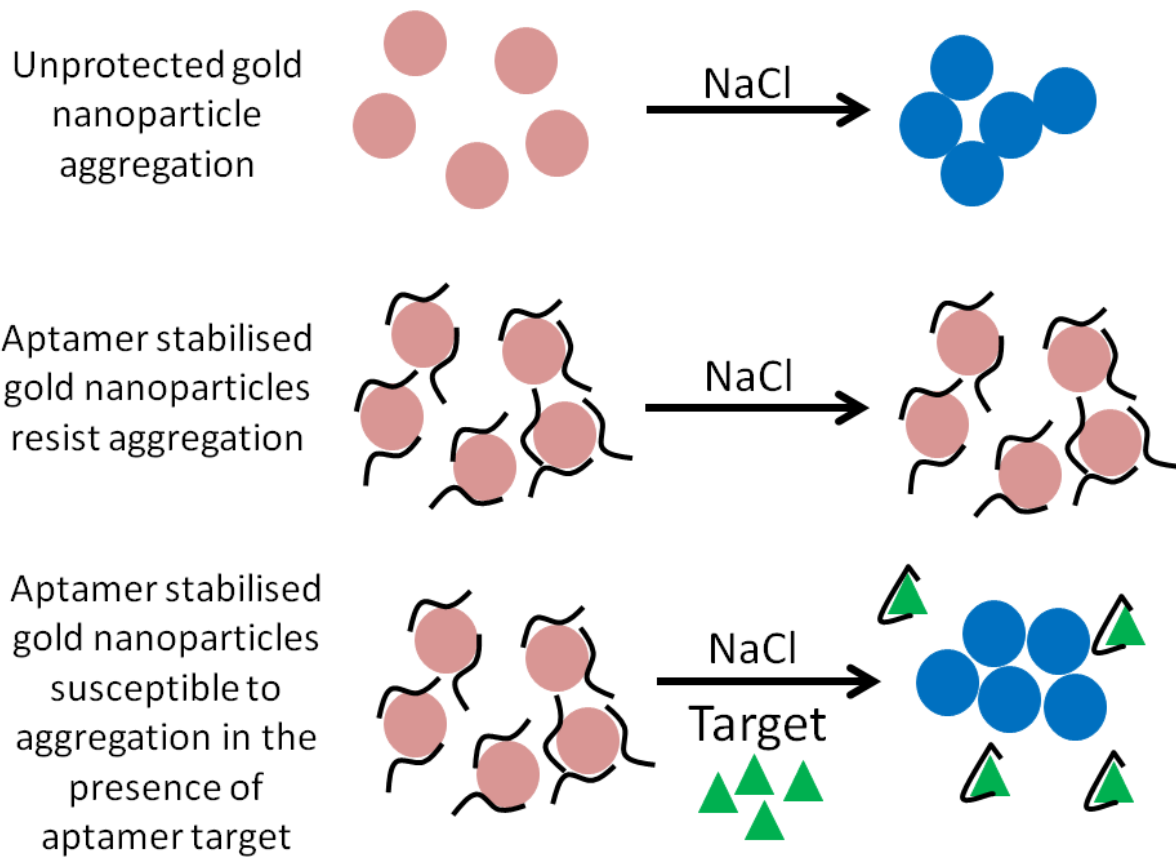

**Figure S5. Schematic of GNP assay.**

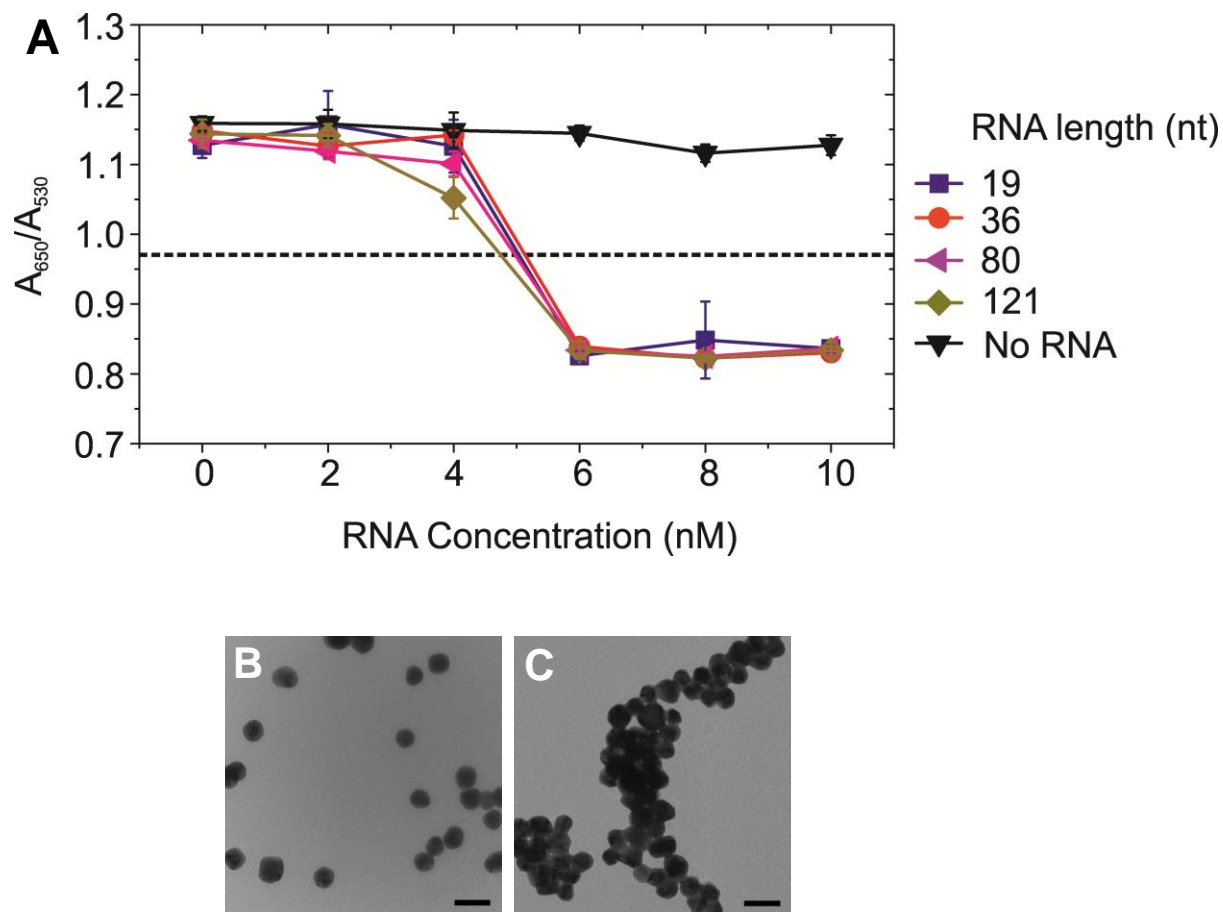

**Figure S6. RNA stabilisation of GNPs.** RNAs of different lengths (A) were titrated against gold nanoparticles and incubated for 1 minute before 1 M NaCl was added (61 mM final concentration). The dashed line in the graph highlights the ratio at which the visible colour change occurs: above the line the solutions are blue and below it they are red. Also shows TEM images of GNPs exposed to salt with (B) and without (C) physi-sorbed 2'-F LGA11 aptamer. Scale bars = 50 nm.

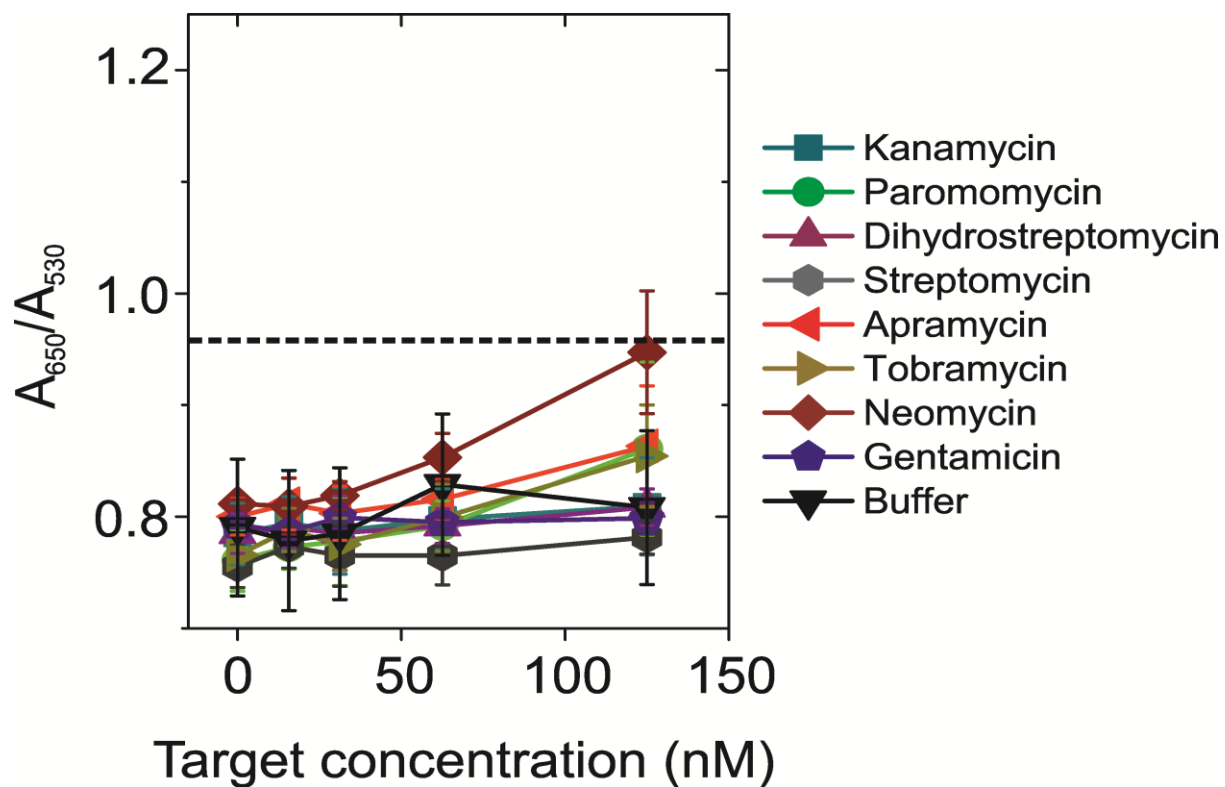

**Figure S7. Naive RNA library: GNP assay against the range of AMGs.** 61 mM NaCl (final concentration was used). The dashed line in the graph highlights the ratio at which the visible colour change occurs: above the line the solutions are blue and below it they are red.

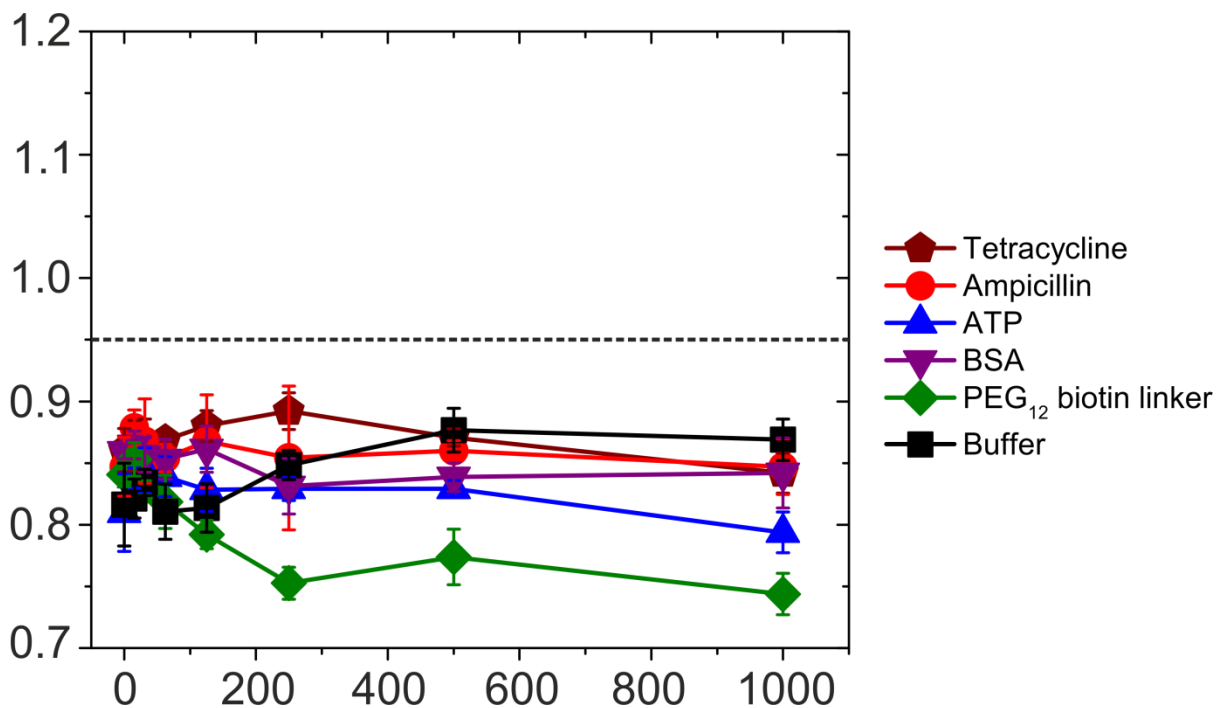

**Figure S8. GNP detection to non- AMG compounds.** Shows the results of the GNP-LGA11 aptamer assay against tetracycline, ampicillin, ATP, BSA and PEG<sub>12</sub> biotin linker. 61 mM NaCl (final concentration was used). The dashed line in the graph highlights the ratio at which the visible colour change occurs: above the line the solutions are blue and below it they are red.



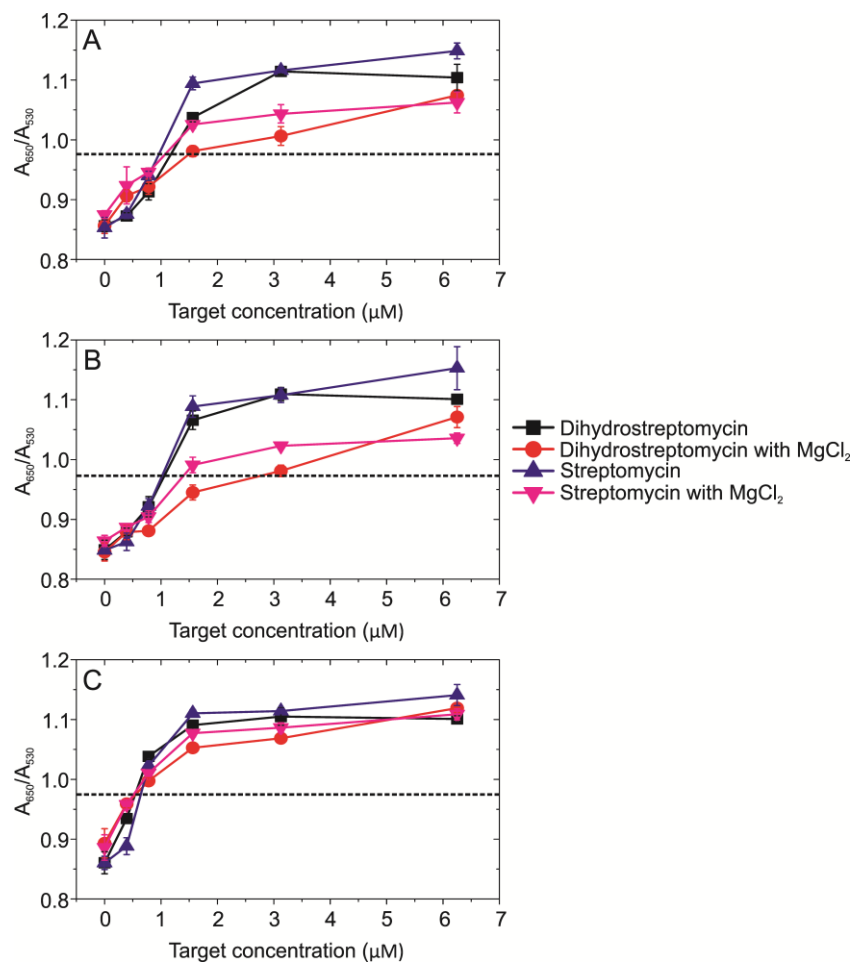

**Figure S9. GNP detection of streptomycin and dihydrostreptomycin.** Shows the results of the GNP-LS13 (A), GNP-SB84 (B) and GNP-TOBR12CA (C) aptamer assays against streptomycin and dihydrostreptomycin in the presence/absence of 0.5 mM  $\text{MgCl}_2$ . 61 mM NaCl (final concentration was used).

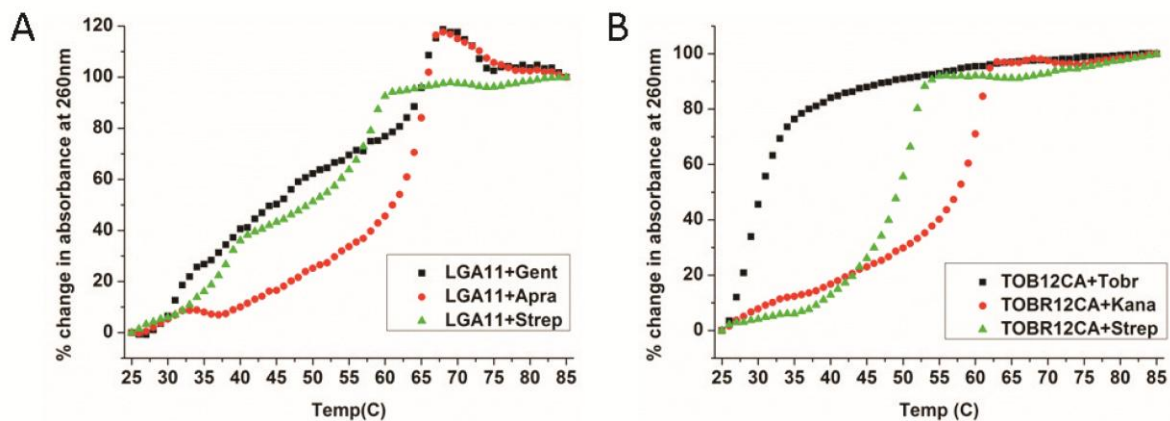

**Figure S10. Solution ligand binding by the anti-AMG aptamers.** LGA11 (A) and the 2'-F version of TOBR12CA (B) were incubated with their selection targets and other AMGs (Gent- gentamicin, Apra- apramycin, Strep- streptomycin, Tobr- tobramycin, and Kana- kanamycin) at equimolar concentration then diluted to 400 nM in urea (6 M final concentration) and heated from 25 to 85°C and back in 3 cycles. The absorbance at 260 nm was observed and plotted as the % change vs. temperature.
